# Supplementary material
Source: publisher figshare collection journal article supplement (https://karger.figshare.com/ndownloader/files/26128817)
Supplement: Supplementary file 1 [file 26128817]

## Sheet: Sheet1
Table S1. List of antibodies used in the study.
